# Supplementary material for: The structural basis for recognition of base J containing DNA by a novel DNA binding domain in JBP1
Source: PubMed Central journal article supplement — Nucleic Acids Res. 2011 Mar 16;39(13):5715–28. doi: 10.1093/nar/gkr125 (PMC3141245; doi:10.1093/nar/gkr125), 2011-03-16

# **JBP ± Jbase DNA**

Revised data analysis January 2010

# JBP sequence coverage

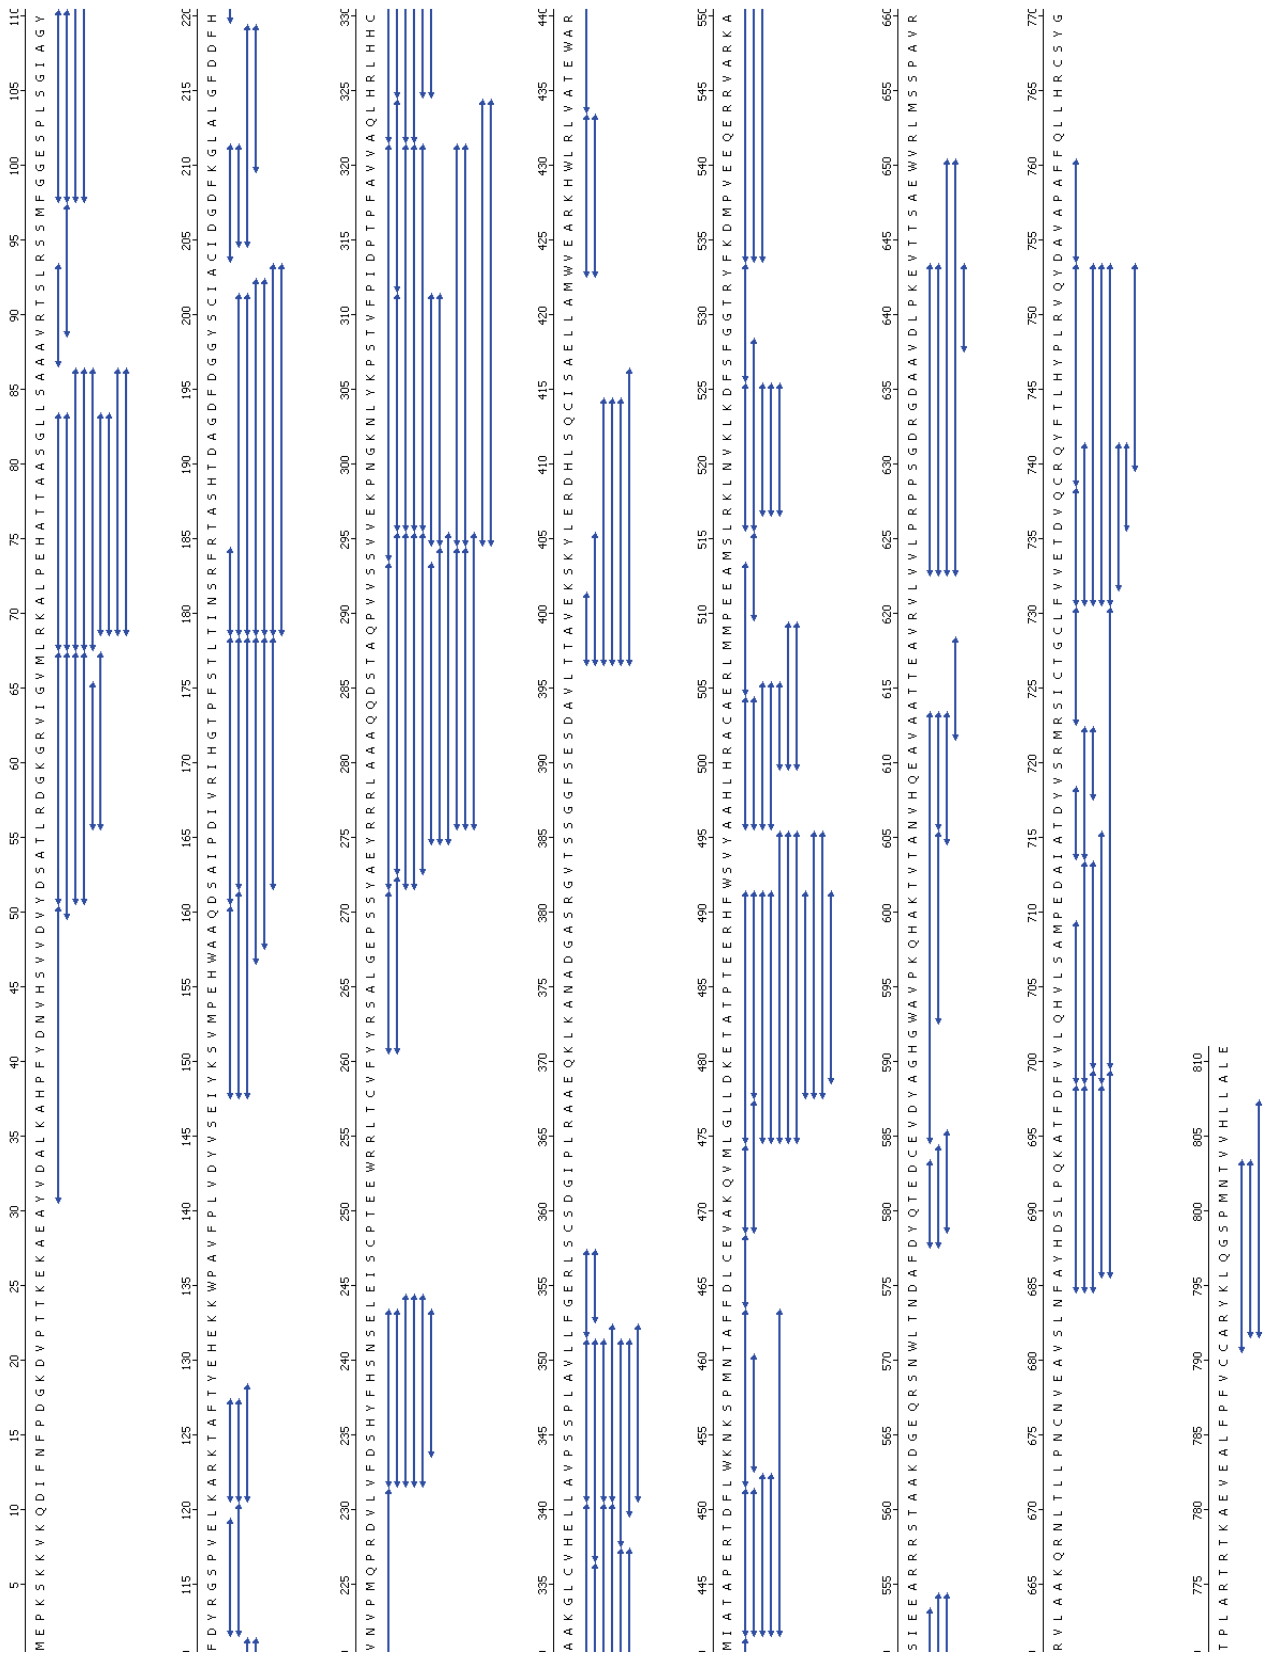

# JBP H/D exchange

5 10 15 20 25 30 35 40 45 50 55 60 65 70 75 80 85 90 95 100 105 110 115 120 125 130 135 140 145

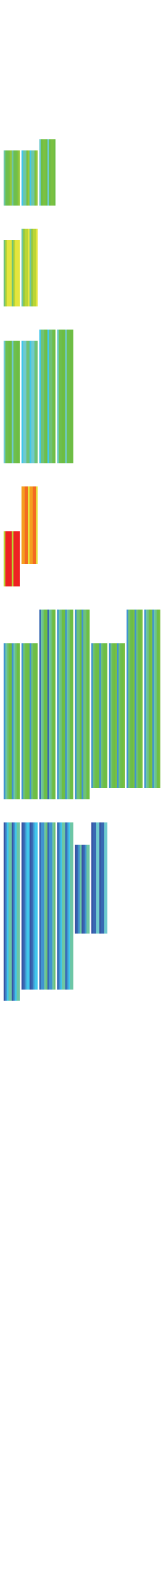

1 145 150 155 160 165 170 175 180 185 190 195 200 205 210 215 220 225 230 235 240 245 250 255 260 265 270 275 280 285

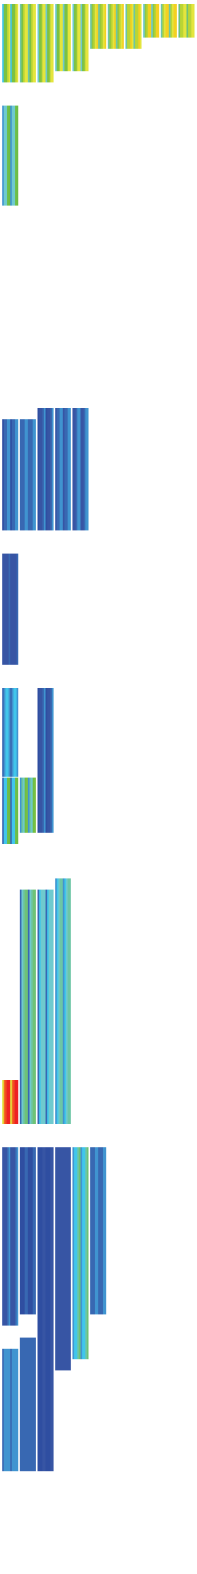

1 285 290 295 300 305 310 315 320 325 330 335 340 345 350 355 360 365 370 375 380 385 390 395 400 405 410 415 420 425

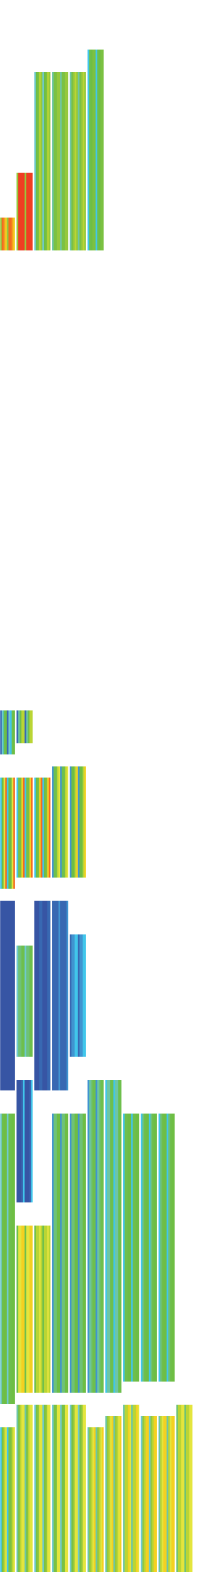

1 425 430 435 440 445 450 455 460 465 470 475 480 485 490 495 500 505 510 515 520 525 530 535 540 545 550 555 560 565

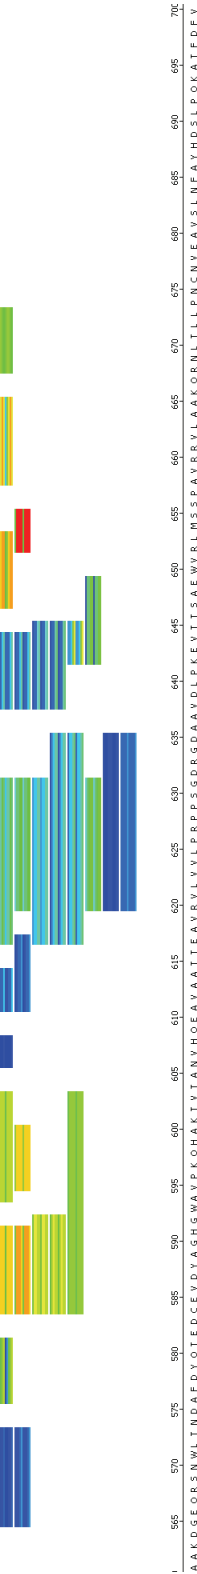

1 565 570 575 580 585 590 595 600 605 610 615 620 625 630 635 640 645 650 655 660 665 670 675 680 685 690 695 700 705

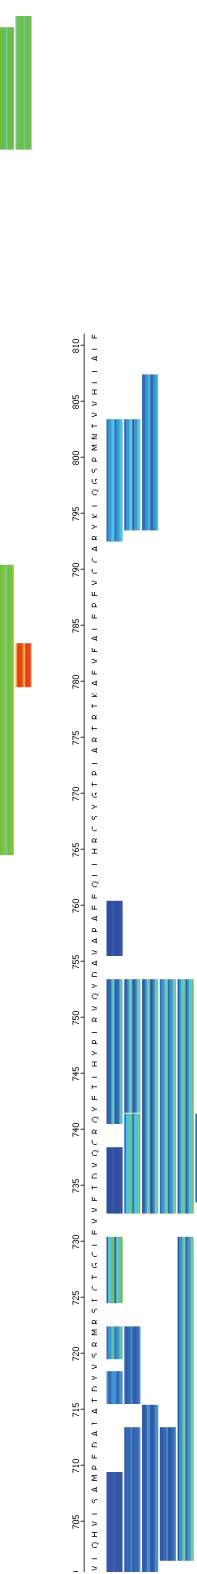

1 705 710 715 720 725 730 735 740 745 750 755 760 765 770 775 780 785 790 795 800 805 810 815

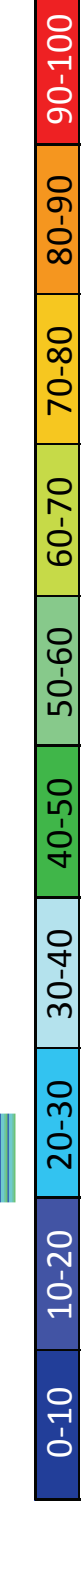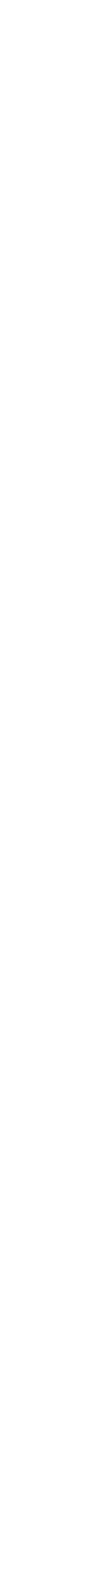

# JBP H/D exchange ± DNA

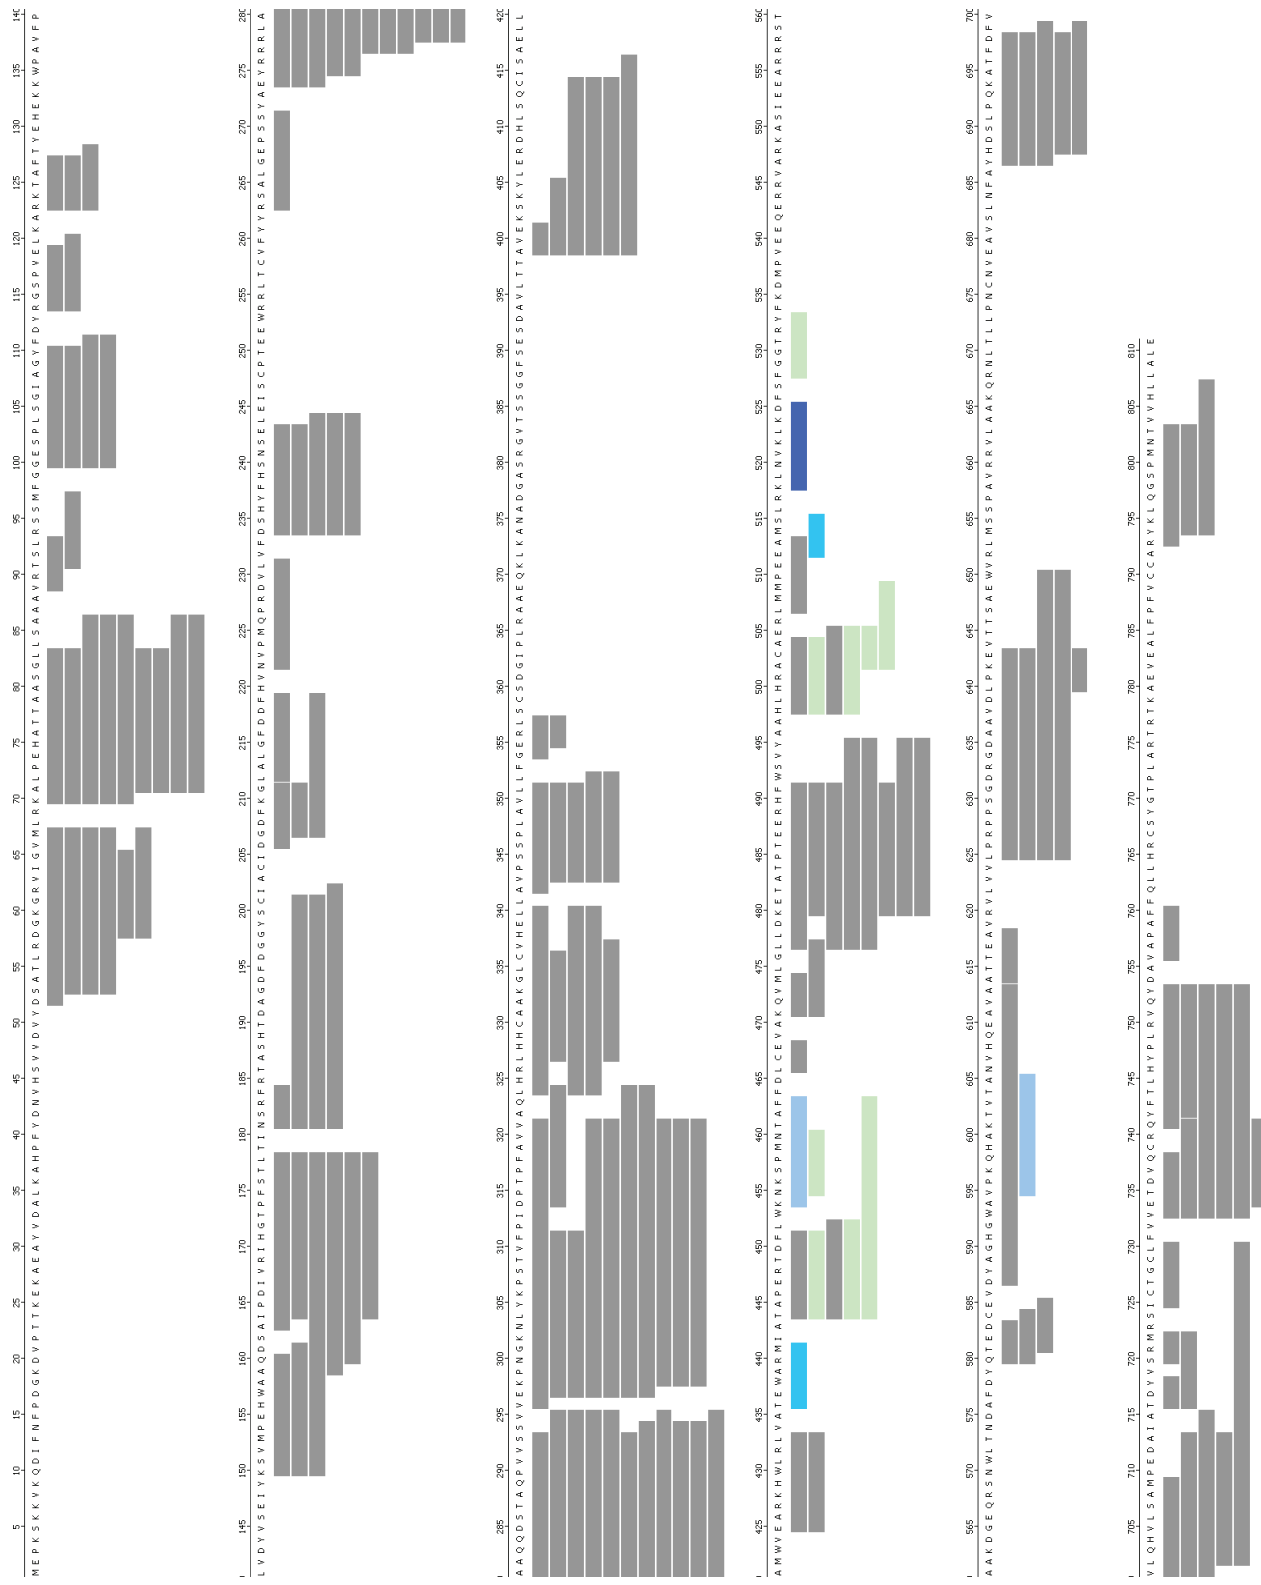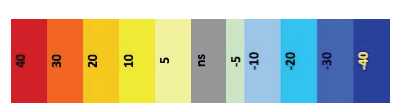

| Sequence                  | Z | Start | End | % Change | Std | 272 | 293 | -1  | 1 |
|---------------------------|---|-------|-----|----------|-----|-----|-----|-----|---|
| YAEYRRRLAAQQDSTAQPWVS     | 3 | 50    | 67  | -1       | 1   | 272 | 293 | -1  | 1 |
| YAEYRRRLAAQQDSTAQPWSSV    | 2 | 51    | 67  | -1       | 1   | 272 | 295 | -3  | 1 |
| YAEYRRRLAAQQDSTAQPWSSV    | 3 | 51    | 67  | -1       | 2   | 273 | 295 | -2  | 1 |
| AEYRRRLAAQQDSTAQPWSSV     | 2 | 51    | 67  | -1       | 1   | 273 | 295 | -1  | 1 |
| AEYRRRLAAQQDSTAQPWSSV     | 3 | 51    | 67  | -2       | 1   | 273 | 295 | -1  | 1 |
| YRRRLAAQQDSTAQPWVS        | 3 | 56    | 65  | -1       | 1   | 275 | 293 | -1  | 2 |
| YRRRLAAQQDSTAQPWSS        | 3 | 56    | 67  | -1       | 1   | 275 | 294 | -1  | 2 |
| YRRRLAAQQDSTAQPWSSV       | 2 | 68    | 83  | 0        | 1   | 275 | 295 | -1  | 2 |
| YRRRLAAQQDSTAQPWSS        | 3 | 68    | 83  | -1       | 1   | 276 | 294 | -1  | 1 |
| RRRLAAQQDSTAQPWSS         | 2 | 68    | 86  | -1       | 1   | 276 | 294 | 0   | 1 |
| RRRLAAQQDSTAQPWSS         | 3 | 68    | 86  | -1       | 1   | 276 | 295 | -1  | 1 |
| RRRLAAQQDSTAQPWSSV        | 4 | 68    | 86  | -2       | 2   | 294 | 321 | -1  | 1 |
| SVVEKPNKLYKPSTVFPIDTPFAVV | 2 | 69    | 83  | -1       | 2   | 295 | 311 | -1  | 2 |
| VVEKPNKLYKPSTV            | 3 | 69    | 83  | -2       | 2   | 295 | 311 | 0   | 2 |
| VVEKPNKLYKPSTVFPIDTPFAVV  | 4 | 69    | 86  | -1       | 1   | 295 | 321 | -1  | 1 |
| VVEKPNKLYKPSTVFPIDTPFAVV  | 3 | 69    | 86  | -1       | 1   | 295 | 321 | -1  | 1 |
| VVEKPNKLYKPSTVFPIDTPFAVV  | 4 | 69    | 86  | -1       | 1   | 295 | 321 | -1  | 1 |
| VVEKPNKLYKPSTVFPIDTPFAVV  | 3 | 87    | 93  | 1        | 3   | 295 | 324 | -1  | 1 |
| VVEKPNKLYKPSTVFPIDTPFAVV  | 4 | 87    | 93  | -4       | 4   | 295 | 324 | -1  | 1 |
| VVEKPNKLYKPSTVFPIDTPFAVV  | 2 | 89    | 97  | -1       | 1   | 296 | 321 | 0   | 1 |
| VVEKPNKLYKPSTVFPIDTPFAVV  | 1 | 98    | 110 | -1       | 1   | 296 | 321 | 0   | 1 |
| VVEKPNKLYKPSTVFPIDTPFAVV  | 2 | 98    | 110 | 0        | 1   | 296 | 321 | 0   | 1 |
| VVEKPNKLYKPSTVFPIDTPFAVV  | 1 | 98    | 111 | -2       | 1   | 296 | 321 | -1  | 1 |
| VVEKPNKLYKPSTVFPIDTPFAVV  | 2 | 98    | 111 | -2       | 2   | 312 | 324 | -1  | 1 |
| DYRGSFVE                  | 2 | 112   | 119 | -2       | 2   | 322 | 340 | 1   | 1 |
| DYRGSFVEL                 | 1 | 112   | 120 | -2       | 2   | 322 | 340 | 0   | 1 |
| KARKTAF                   | 1 | 121   | 127 | -1       | 3   | 322 | 340 | 0   | 1 |
| KARKTAF                   | 2 | 121   | 127 | -4       | 1   | 325 | 336 | 0   | 3 |
| KARKTAF                   | 2 | 121   | 128 | -2       | 1   | 325 | 337 | -1  | 2 |
| IKYSVMPEHWAQ              | 3 | 148   | 160 | -1       | 1   | 340 | 351 | -1  | 3 |
| IKYSVMPEHWAQD             | 3 | 148   | 161 | -1       | 1   | 341 | 351 | 0   | 2 |
| IKYSVMPEHWAQD             | 3 | 148   | 178 | -1       | 0   | 341 | 351 | 0   | 2 |
| IKYSVMPEHWAQD             | 3 | 157   | 178 | -1       | 0   | 341 | 352 | 0   | 1 |
| WAAQD                     | 3 | 158   | 178 | 0        | 1   | 341 | 352 | -2  | 2 |
| AAQD                      | 3 | 161   | 178 | -1       | 0   | 352 | 357 | 0   | 3 |
| DSAI                      | 3 | 162   | 178 | -1       | 0   | 353 | 357 | -3  | 3 |
| SAIP                      | 3 | 162   | 178 | -1       | 1   | 397 | 401 | 1   | 2 |
| SAIP                      | 2 | 179   | 184 | 0        | 3   | 397 | 405 | 1   | 2 |
| TINSRF                    | 2 | 179   | 201 | -1       | 1   | 397 | 414 | 1   | 2 |
| TINSRFTASH                | 2 | 179   | 201 | -1       | 1   | 397 | 414 | 1   | 2 |
| TINSRFTASH                | 3 | 179   | 201 | -1       | 1   | 397 | 414 | 1   | 2 |
| TINSRFTASH                | 3 | 179   | 201 | -1       | 2   | 397 | 414 | 0   | 1 |
| TINSRFTASH                | 3 | 204   | 211 | -2       | 1   | 397 | 416 | 1   | 1 |
| CIDGDFKG                  | 2 | 205   | 211 | -1       | 2   | 423 | 433 | -2  | 0 |
| IDGDFKG                   | 2 | 205   | 219 | -1       | 1   | 423 | 433 | -2  | 0 |
| IDGDFKGLALGDFDF           | 2 | 210   | 219 | -1       | 2   | 434 | 441 | -23 | 4 |
| KGLALGDFDF                | 2 | 220   | 231 | -1       | 0   | 442 | 451 | -5  | 2 |
| HVNVP                     | 2 | 232   | 243 | -1       | 2   | 442 | 451 | -8  | 2 |
| VFDSHYFHSNSE              | 3 | 232   | 243 | -1       | 1   | 442 | 452 | -4  | 2 |
| VFDSHYFHSNSE              | 3 | 232   | 244 | -1       | 1   | 442 | 452 | -8  | 2 |
| VFDSHYFHSNSE              | 1 | 232   | 244 | -1       | 1   | 442 | 463 | -9  | 1 |
| VFDSHYFHSNSE              | 2 | 232   | 244 | -1       | 0   | 442 | 463 | -12 | 2 |
| VFDSHYFHSNSE              | 3 | 232   | 244 | -2       | 1   | 452 | 463 | -12 | 2 |
| YRSALGEPSS                | 2 | 261   | 271 | -4       | 2   | 453 | 460 | -5  | 2 |
| FDLCE                     | 1 | 261   | 271 | -4       | 1   | 464 | 468 | -4  | 1 |



434-441 (+2)

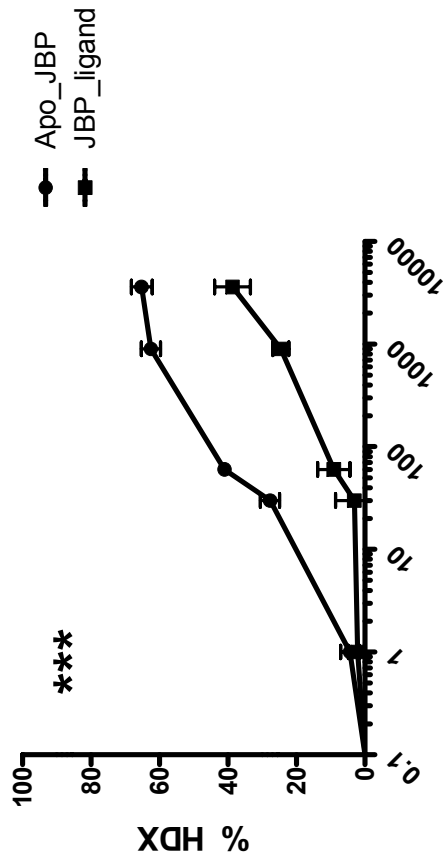

516-525 (+3)

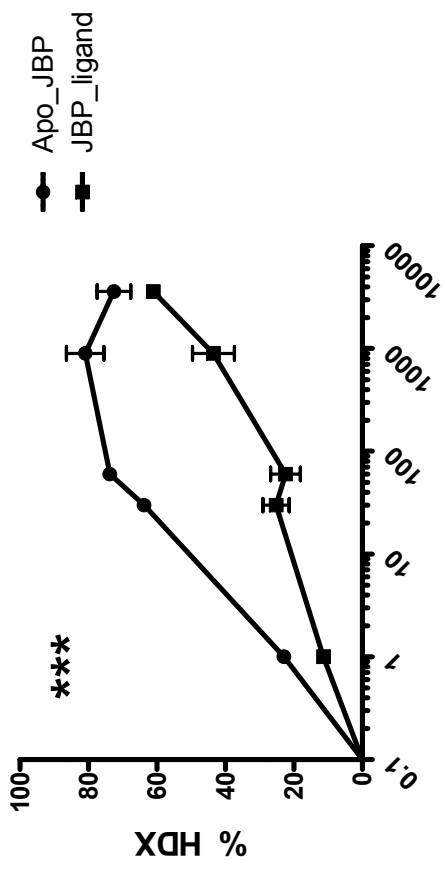

452-463 (+3)

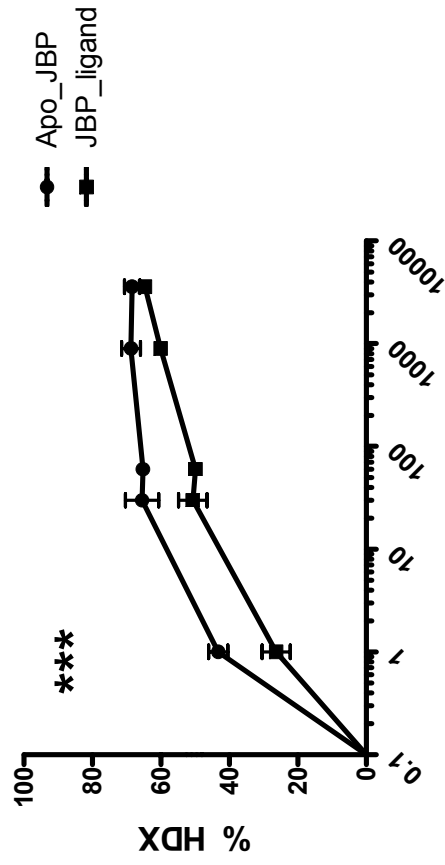

593-605 (+3)

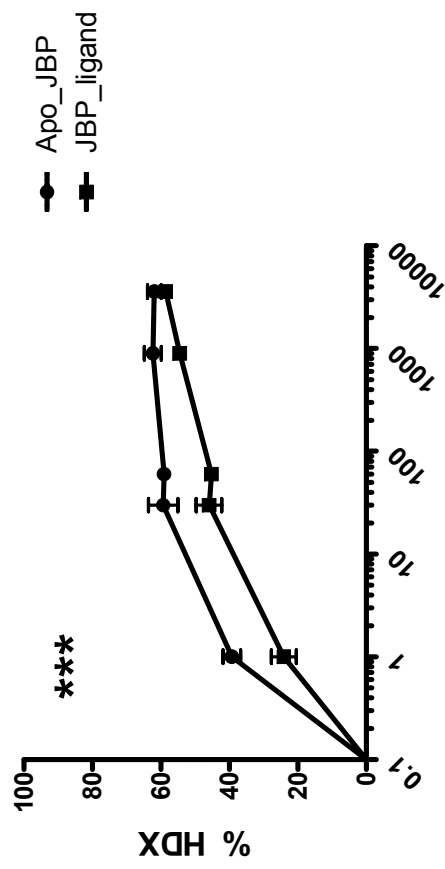

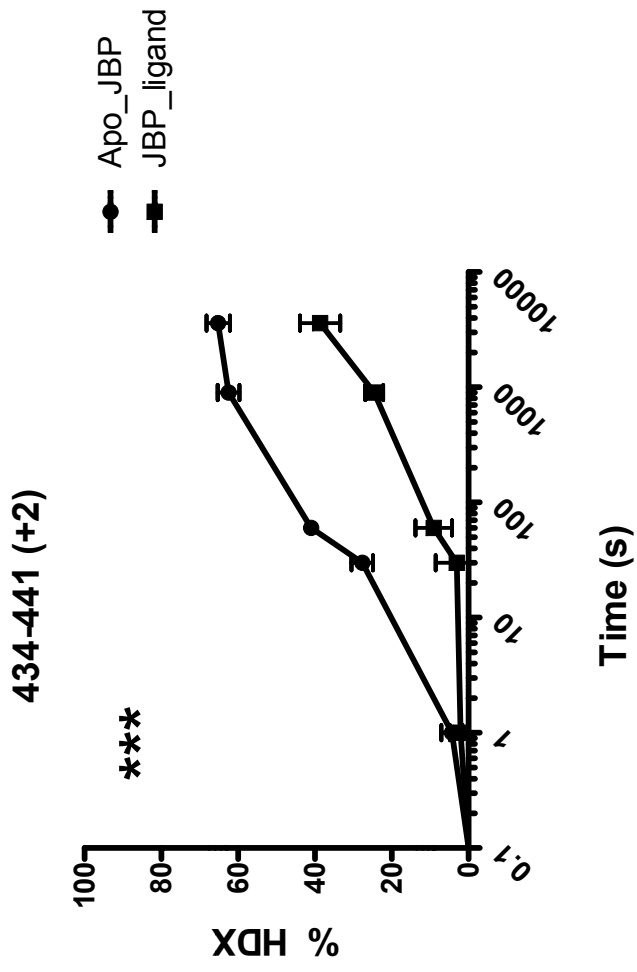



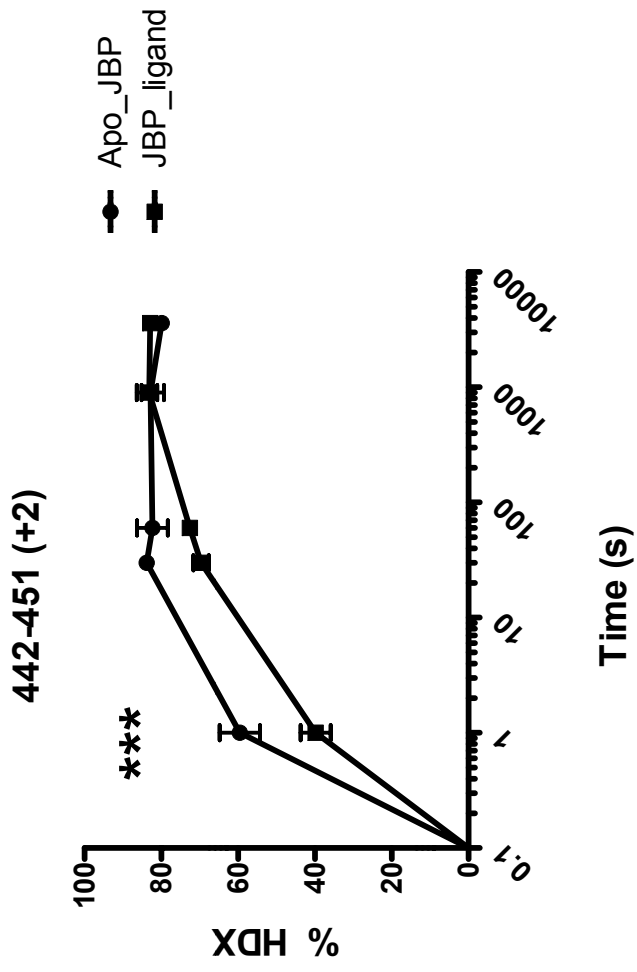

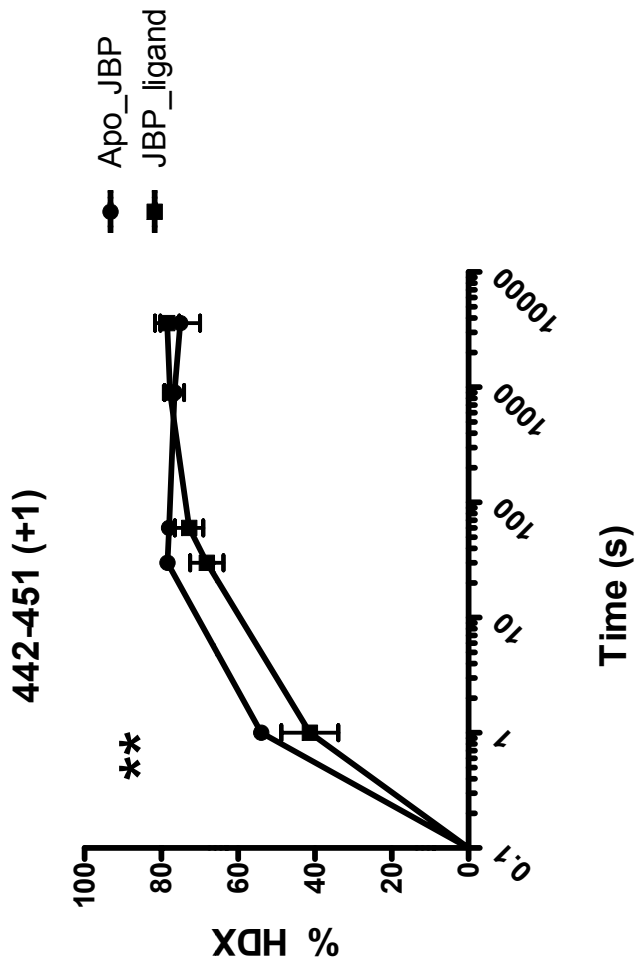

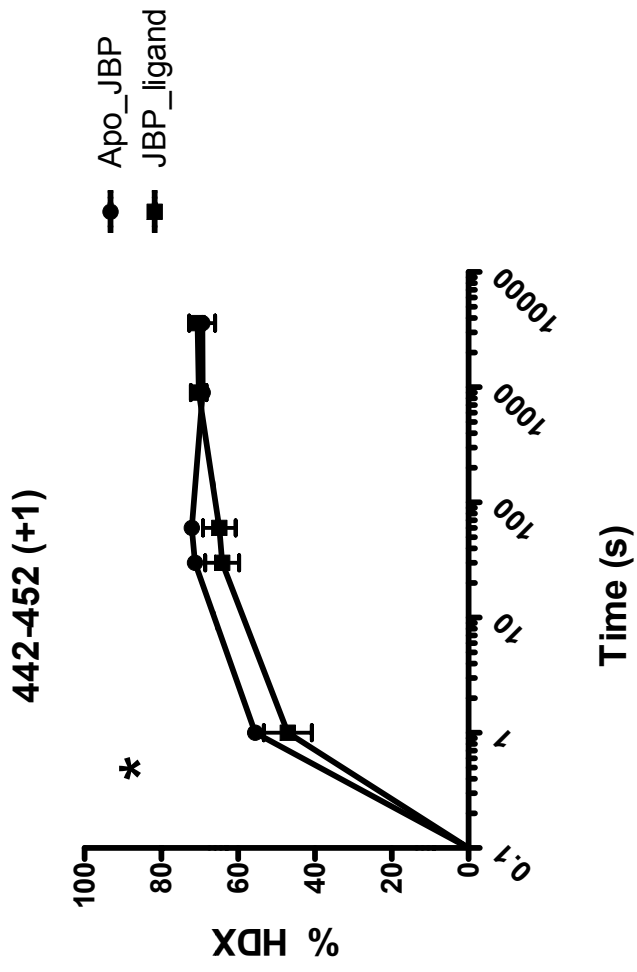

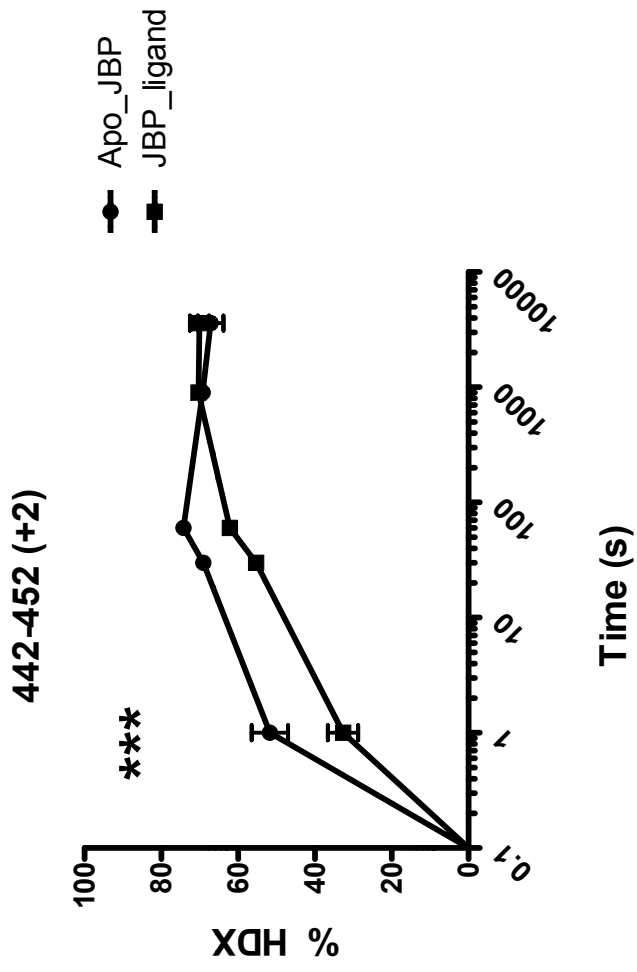

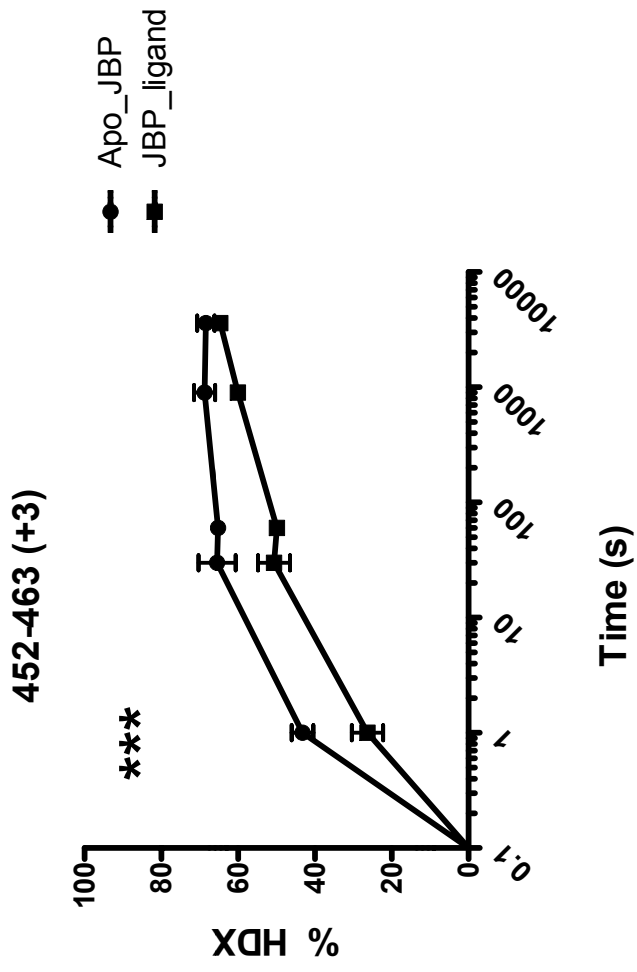

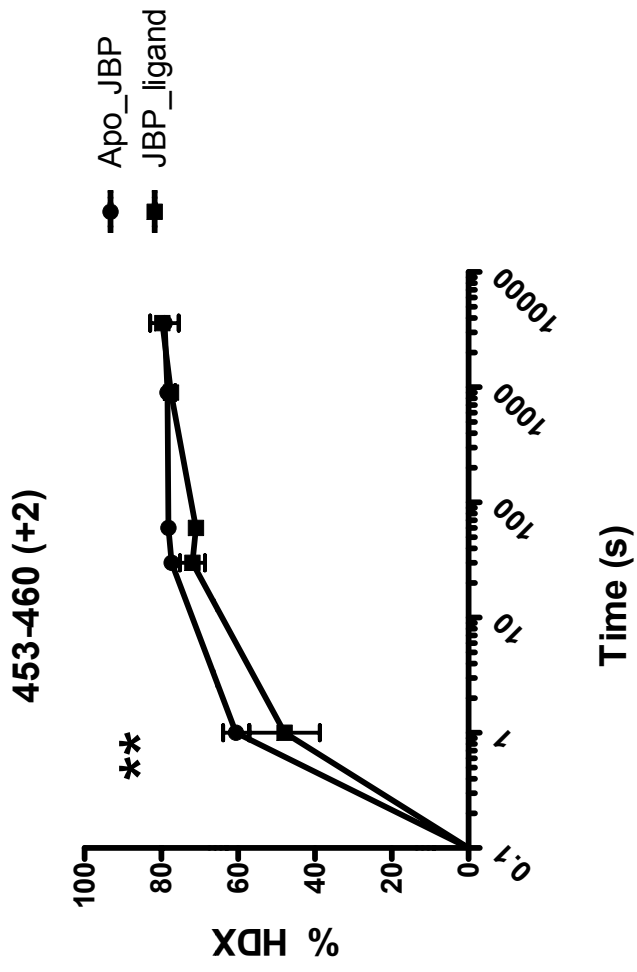

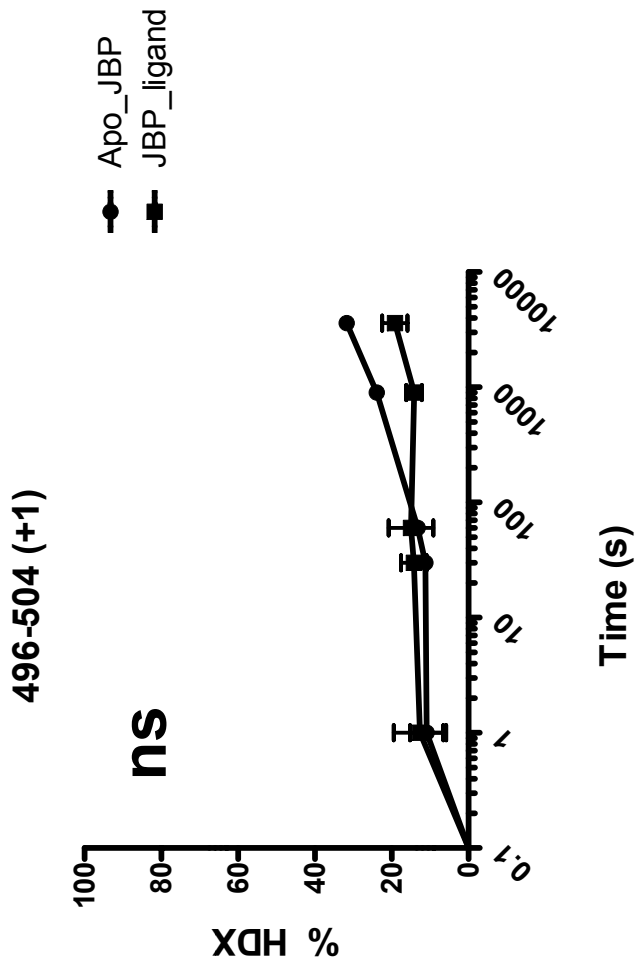

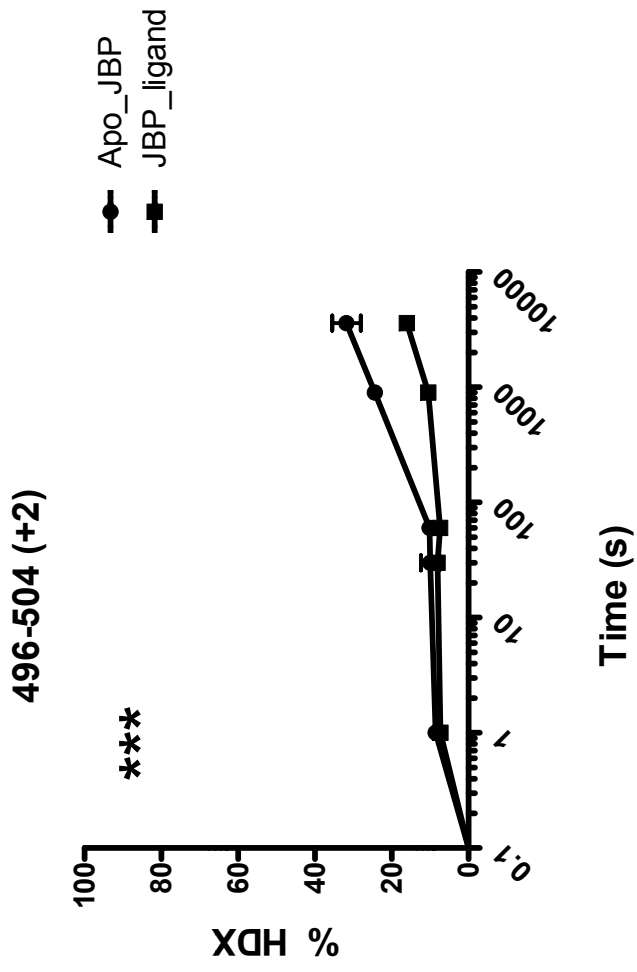



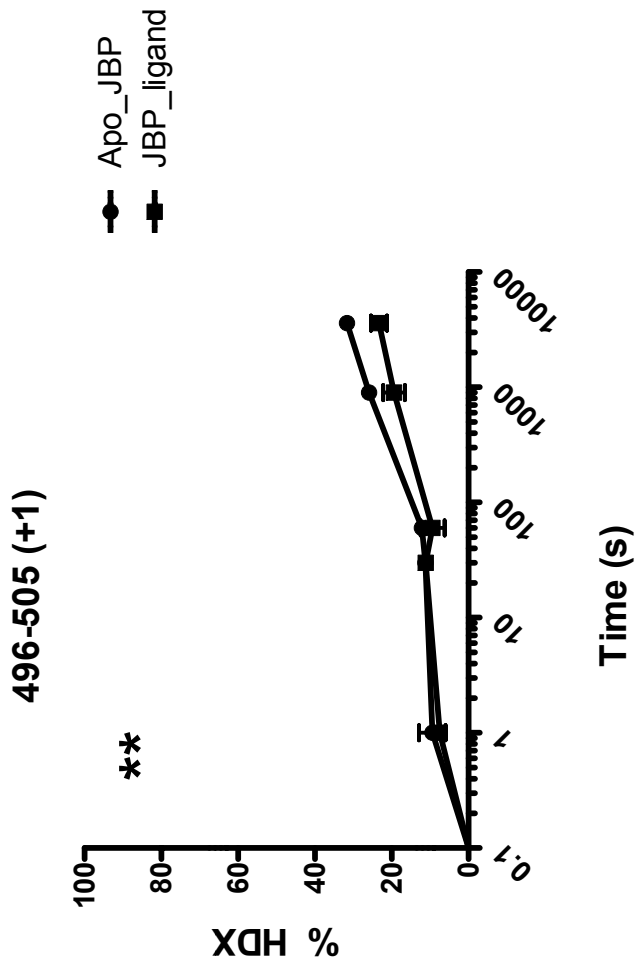

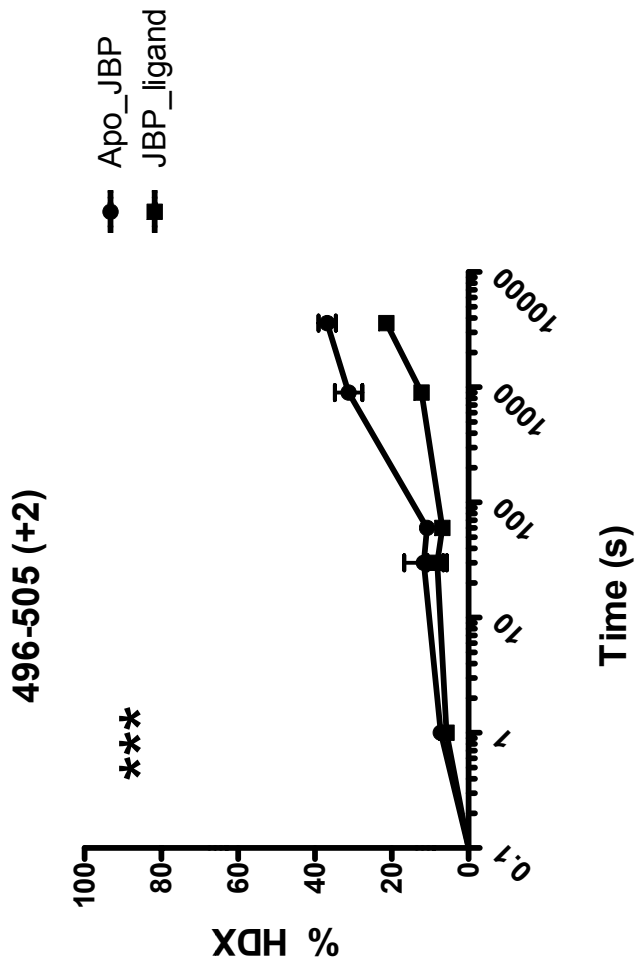

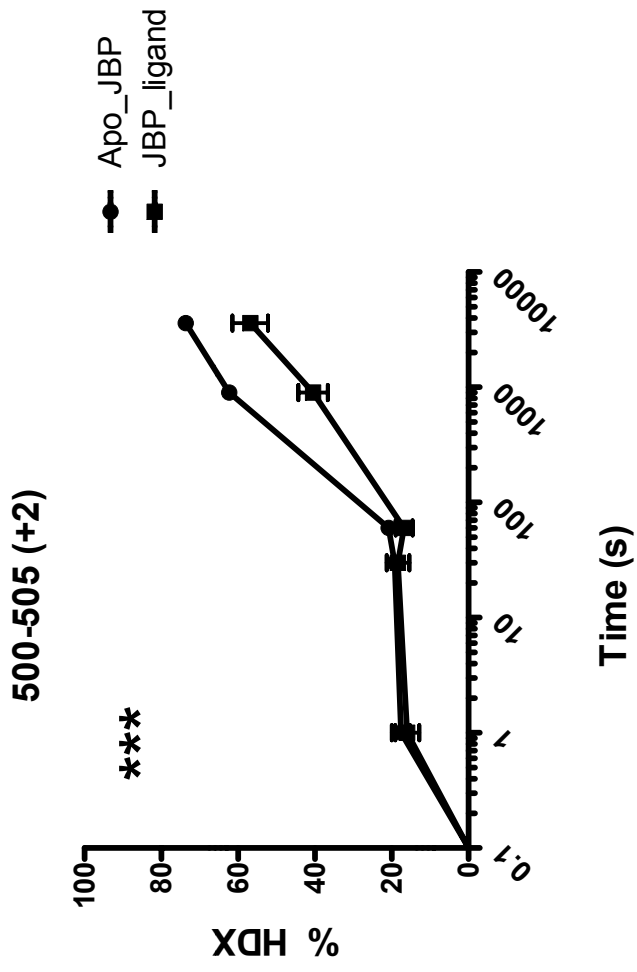

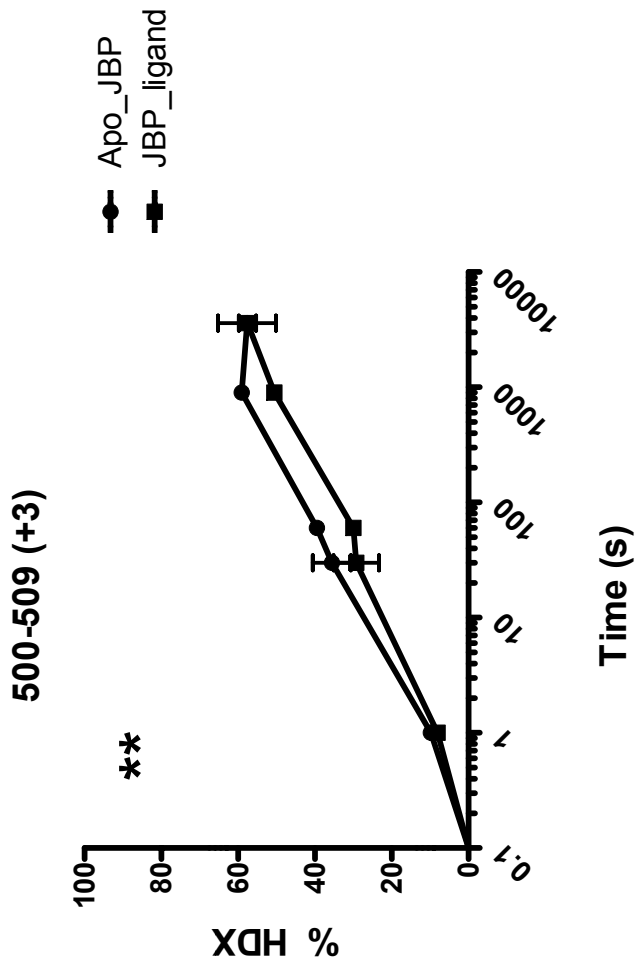

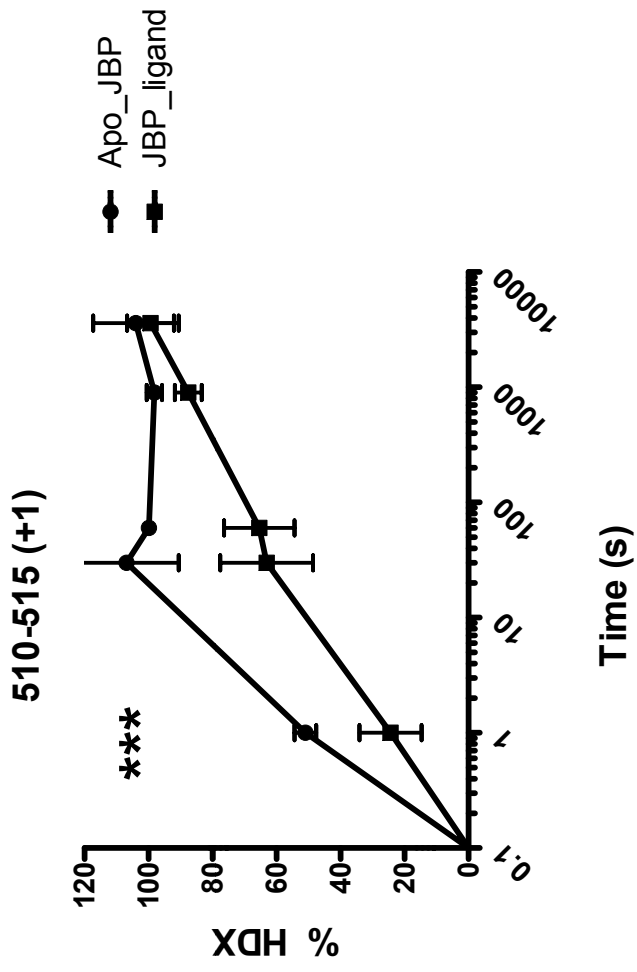

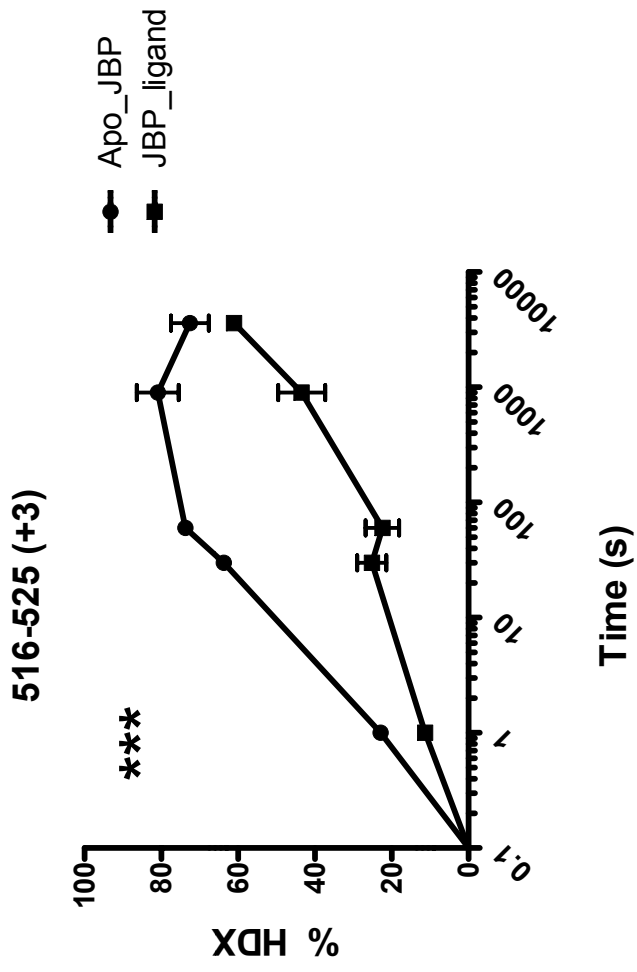

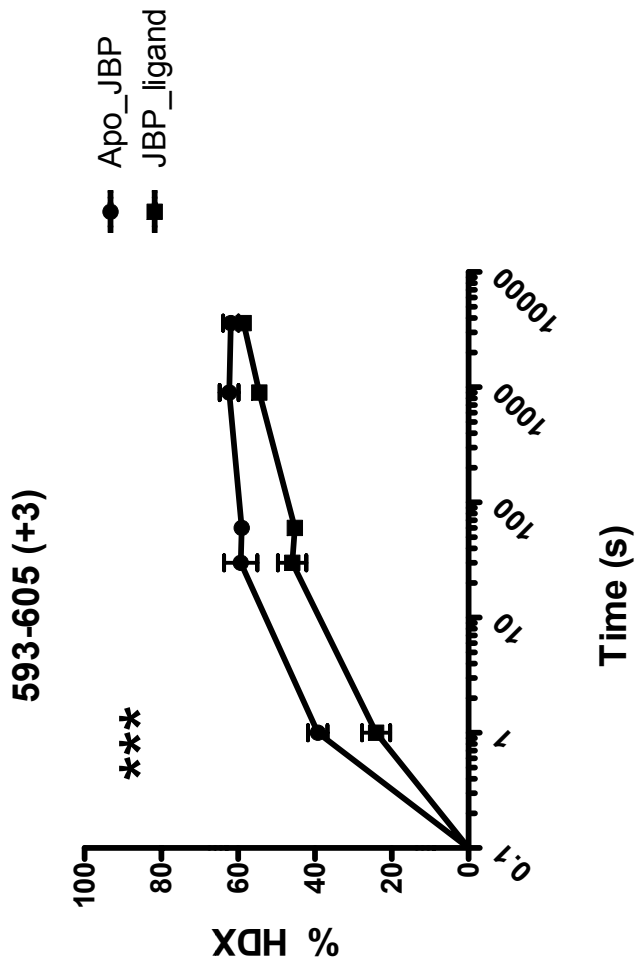

Supplement: supp_gkr125_JBP_final_data_slides_Jan_2010.pdf [file supp_gkr125_JBP_final_data_slides_Jan_2010.pdf]
